# Supplementary material for: Unveiling the photophysical and excited state properties of multi-resonant OLED emitters using combined DFT and CCSD method
Source: Royal Society of Chemistry journal article supplement (doi:10.1039/d4cp00637b), 2024-01-01
Supplement: d4cp00637b1.pdf [file d4cp00637b1.pdf]

Supporting information for

**Unveiling the Photophysical and Excited State Properties of Multi-Resonant OLED  
Emitters using Combined DFT and CCSD Method**

Pandiyan Sivasakthi,<sup>a,b</sup> Pralok K. Samanta<sup>a,b,\*</sup>

<sup>a</sup>Department of Chemistry, Birla Institute of Technology and Science (BITS) Pilani, Hyderabad  
Campus, Hyderabad-500078, India.

<sup>b</sup>Department of Chemistry, School of Science, GITAM University, Hyderabad-502329, India.

\*Corresponding author: pralokkumar.samanta@hyderabad.bits-pilani.ac.in,

pralok.samanta@gmail.com

**Contents**

| <b><i>S.<br/>No.</i></b> | <b><i>Contents</i></b>                                                                                                         | <b><i>Page<br/>No.</i></b> |
|--------------------------|--------------------------------------------------------------------------------------------------------------------------------|----------------------------|
| <b>1</b>                 | STEOM-SNPNO-CCSE Configuration Details                                                                                         | <b>S2</b>                  |
| <b>2</b>                 | <b>Table S1a.</b> Optimally tuned $\omega$ values                                                                              | <b>S3</b>                  |
| <b>3</b>                 | <b>Table S1b.</b> Intramolecular Reorganization Energy                                                                         | <b>S3</b>                  |
| <b>4</b>                 | <b>Table S1c.</b> CzBX molecules structural relaxation                                                                         | <b>S3</b>                  |
| <b>5</b>                 | <b>Table S1d:</b> Comparison of lowest energy optical absorption (in eV) with 6-31G(d) and 6-31+G(d) basis sets.               | <b>S3</b>                  |
| <b>6</b>                 | <b>Table S2.</b> HOMO, LUMO, energy gap ( $\Delta E_{H-L}$ ) of CzBX and CzBX2X series in eV using combined DFT-CCSD method.   | <b>S4</b>                  |
| <b>7</b>                 | <b>Table S3.</b> Optical energy orbital absorption and emission energies configurations obtained using STEOM-DLPNO-CCSD        | <b>S5</b>                  |
| <b>8</b>                 | <b>Table S4.</b> Wavelengths for lowest energy optical absorption, fluorescence and phosphorescence energies                   | <b>S5</b>                  |
| <b>9</b>                 | <b>Table S5.</b> Calculation of $k_{RISC}$ (in $s^{-1}$ ) for CzBX molecules with $\lambda_M=0.1$ eV and $\lambda_M=0.2$ eV    | <b>S5-6</b>                |
| <b>10</b>                | <b>Figure S1.</b> Excited states optimized structures                                                                          | <b>S7</b>                  |
| <b>11</b>                | <b>Figure S2.</b> NTOs of CzBX series of molecules for their the $S_1$ , $T_1$ and $T_2$ states                                | <b>S8</b>                  |
| <b>12</b>                | <b>Table S6.</b> Calculated excited states ( $S_1$ , $T_1$ & $T_2$ ) chalcogens atom distance with carbon atom all values in Å | <b>S9</b>                  |
| <b>13</b>                | <b>Table S7.</b> Calculated emission rate $k_F$ and $k_P$ at 300° temperature                                                  | <b>S9</b>                  |
| <b>14</b>                | <b>References</b>                                                                                                              | <b>S10</b>                 |

## 1. STEOM-DLPNO-CCSD Configuration Details:

The TD-DFT (as implemented in Gaussian 16) and DLPNO-STEOM-CCSD (as implemented in ORCA software) methods were used to figure out the excited state vertical excitation energies. The RIJCOSX approximation was used in the STEOM integral dressing step. Three roots were requested for lowest excited state  $S_1$ ,  $T_1$  and Six roots were requested for  $T_2$  excited state using ORCA's "TightPNO" settings<sup>1</sup> following the default thresholds. Since the quality of the singles (diagonal) PNOs is especially important, these are generated as a separate set using a tighter than usual threshold of  $T_{\text{CutPNOsingles}} = 6.6 \times 10^{10}$ . The cutoff values for the natural orbital occupation numbers in the active space selection procedure for the occupied and virtual orbitals ("Othresh" and "Vthresh", respectively) were set to  $5 \times 10^3$  (Othresh, VThresh  $1 \times 10^2$  for few molecules).

During the calculation, **STEOMSOC** is set to true. To include the solvation effects, a conductor-like continuum solvation model (CPCM) with toluene solvent was used during the DLPNO-STEOM-CCSD calculations. From the above configurations, we achieved a percentage active character of 97.5% above for all the molecules and the HOMO to LUMO (H→L) orbital contribution reached above 93% for all the molecules. The below 97 percentage active character were resubmitted with Othresh and VThresh  $1 \times 10^2$  configuration reached 97.5%.<sup>2</sup> From the wave-function calculation results, we considered the SOC matrix elements and  $\Delta E_{\text{ST}}$  values.

**Table S1a.** Optimally tuned  $\omega$  values (in Bohr<sup>-1</sup>) for the CzBX and CzBX2X molecules calculated at the  $\omega\text{B97XD}/6\text{-}31\text{+G(d)}$  level. (here X=O, S and Se)

| <b>CzBX</b> | <b><math>\omega</math></b> | <b>CzBO2X</b> | <b><math>\omega</math></b> | <b>CzBS2X</b> | <b><math>\omega</math></b> | <b>CzBSe2X</b> | <b><math>\omega</math></b> |
|-------------|----------------------------|---------------|----------------------------|---------------|----------------------------|----------------|----------------------------|
| CzBO        | 0.1507                     | CzBO2O        | 0.1555                     | CzBS2O        | 0.1525                     | CzBSe2O        | 0.1516                     |
| CzBS        | 0.1487                     | CzBO2S        | 0.1494                     | CzBS2S        | 0.1465                     | CzBSe2S        | 0.1459                     |
| CzBSe       | 0.1492                     | CzBO2Se       | 0.1477                     | CzBS2Se       | 0.1449                     | CzBSe2Se       | 0.1434                     |

**Table S1b.** CzBX molecules structural relaxation (in eV) between  $S_1$  and  $T_1$  state optimized geometries.

| Molecules | Structural relaxation<br>( $S_1 \leftrightarrow T_1$ ) |
|-----------|--------------------------------------------------------|
| CzBO      | 0.00319                                                |
| CzBS      | 0.00430                                                |
| CzBSe     | 0.00914                                                |

**Table S1c.** Intramolecular Reorganization Energy and root mean square deviation between  $S_1$  and  $T_1$  state optimized geometries.

| Molecules | $\lambda_{\text{intra}}$ (eV) | RMSD ( $\text{\AA}$ ) |
|-----------|-------------------------------|-----------------------|
| CzBO      | 0.004                         | 0.014                 |
| CzBS      | 0.006                         | 0.020                 |
| CzSe      | 0.003                         | 0.041                 |

**Table S1d:** Comparison of lowest energy optical absorption (in eV) with 6-31G(d) and 6-31+G(d) basis sets.

| Molecules | <i>Expt.</i> [Ref.3] | $\omega^*$ B97XD/<br>6-31G(d) | $\omega^*$ B97XD/<br>6-31+G(d) | <i>Combined DFT<br/>and CCSD</i> |
|-----------|----------------------|-------------------------------|--------------------------------|----------------------------------|
| CzBO      | 2.910                | 3.472<br>$f=0.445$            | 3.427<br>$f=0.455$             | 2.938<br>$f=0.342$               |
| CzBS      | 2.774                | 3.318<br>$f=0.407$            | 3.272<br>$f=0.413$             | 2.806<br>$f=0.317$               |
| CzBSe     | 2.749                | 3.226<br>$f=0.383$            | 3.210<br>$f=0.383$             | 2.755<br>$f=0.288$               |
| MAD       | 0                    | 0.527                         | 0.492                          | <b>0.022</b>                     |

Here, MAD is the mean absolute deviations. MAD is generally lower for higher basis set. Thus, we consider 6-31+G(d) basis set for single-point calculations. Also, we it is well know that the higher basis sets do not much affect the geometry. However, in this study, we mostly focus on combined DFT and CCSD method (see Table 2). In our combined DFT and CCSD method, we used OT-SRSH- $\omega$ B97XD/6-31G(d)/LANL2DZ level of theory for geometry optimization and STEOM-DLPNO-CCSD/def2-TZVP level of theory for single-point energy calculation.

**Table S2.** HOMO, LUMO, energy gap ( $\Delta E_{H-L}$ ) of CzBX and CzBX2X series in eV using combined DFT-CCSD method.

| Molecules | $E_{HOMO}$ | $E_{LUMO}$ | $\Delta E_{H-L}$ |
|-----------|------------|------------|------------------|
| CzBO      | -7.537     | 1.183      | 8.720            |
| CzBS      | -7.421     | 1.111      | 8.532            |
| CzBSe     | -7.408     | 1.081      | 8.489            |
| CzBO2O    | -7.551     | 1.287      | 8.838            |
| CzBO2S    | -7.097     | 1.187      | 8.285            |
| CzBO2Se   | -7.163     | 1.106      | 8.269            |
| CzBS2O    | -7.338     | 1.213      | 8.551            |
| CzBS2S    | -7.000     | 1.081      | 8.080            |
| CzBS2Se   | -7.058     | 0.999      | 8.058            |
| CzBSe2O   | -7.287     | 1.169      | 8.456            |
| CzBSe2S   | -7.016     | 1.017      | 8.033            |
| CzBSe2Se  | -7.077     | 0.933      | 8.010            |

**Table S3.** Optical energy orbital absorption and emission energies configurations obtained using STEOM-DLPNO-CCSD.

| Molecules | $\lambda_{abs}(S_0 \rightarrow S_1)$ |            | $\lambda_F(S_1 \rightarrow S_0)$ |            |
|-----------|--------------------------------------|------------|----------------------------------|------------|
|           | Orbital Contribution                 | Percentage | Orbital Contribution             | Percentage |
| CzBO      | H→L                                  | 94         | H→L                              | 93         |
| CzBS      | H→L                                  | 94         | H→L                              | 94         |
| CzBSe     | H→L                                  | 94         | H→L                              | 94         |
| CzBO2O    | H→L                                  | 92         | H→L                              | 95         |
| CzBO2S    | H→L                                  | 93         | H→L                              | 94         |
| CzBO2Se   | H→L                                  | 94         | H→L                              | 94         |
| CzBS2O    | H→L                                  | 93         | H→L                              | 94         |
| CzBS2S    | H→L                                  | 93         | H→L                              | 94         |
| CzBS2Se   | H→L                                  | 93         | H→L                              | 94         |
| CzBSe2O   | H→L                                  | 93         | H→L                              | 96         |
| CzBSe2S   | H→L                                  | 95         | H→L                              | 95         |
| CzBSe2Se  | H→L                                  | 94         | H→L                              | 94         |

**Table S4.** Wavelengths for lowest energy optical absorption, fluorescence and phosphorescence energies (in nm) for CzBX and CzBX2X molecules.

| Molecules | $\lambda_{\text{abs}} (S_0 \rightarrow S_1)$ |                      | $\lambda_{\text{F}} (S_1 \rightarrow S_0)$ |                      | $\lambda_{\text{P}} (T_1 \rightarrow S_0)$ |        |
|-----------|----------------------------------------------|----------------------|--------------------------------------------|----------------------|--------------------------------------------|--------|
|           | <sup>3</sup> Exp.                            | Theory               | <sup>3</sup> Exp.                          | Theory               | <sup>3</sup> Exp.                          | Theory |
| CzBO      | 426                                          | 422.0 ( $f=0.3415$ ) | 445                                        | 446.4 ( $f=0.2985$ ) | 471                                        | 472.7  |
| CzBS      | 447                                          | 441.8 ( $f=0.3169$ ) | 471                                        | 468.3 ( $f=0.2803$ ) | 491                                        | 489.1  |
| CzBSe     | 451                                          | 450.0 ( $f=0.2881$ ) | 477                                        | 476.0 ( $f=0.2666$ ) | 499                                        | 494.1  |
| CzBO2O    | -                                            | 424.4 ( $f=0.1969$ ) | -                                          | 529.2 ( $f=0.1719$ ) | -                                          | 539.0  |
| CzBO2S    | -                                            | 475.8 ( $f=0.1965$ ) | -                                          | 524.0 ( $f=0.1649$ ) | -                                          | 530.0  |
| CzBO2Se   | -                                            | 475.8 ( $f=0.1938$ ) | -                                          | 519.4 ( $f=0.1638$ ) | -                                          | 522.2  |
| CzBS2O    | -                                            | 446.3 ( $f=0.2239$ ) | -                                          | 517.6 ( $f=0.2049$ ) | -                                          | 548.9  |
| CzBS2S    | -                                            | 499.2 ( $f=0.1940$ ) | -                                          | 542.7 ( $f=0.1884$ ) | -                                          | 564.0  |
| CzBS2Se   | -                                            | 502.3 ( $f=0.1987$ ) | -                                          | 545.3 ( $f=0.1696$ ) | -                                          | 556.3  |
| CzBSe2O   | -                                            | 455.7 ( $f=0.2371$ ) | -                                          | 501.4 ( $f=0.2636$ ) | -                                          | 547.2  |
| CzBSe2S   | -                                            | 500.6 ( $f=0.2069$ ) | -                                          | 552.7 ( $f=0.1766$ ) | -                                          | 575.7  |
| CzBSe2Se  | -                                            | 503.7 ( $f=0.2061$ ) | -                                          | 550.5 ( $f=0.1781$ ) | -                                          | 565.0  |

**Table S5a.** Calculation of  $k_{\text{RISC}}$  (in  $\text{s}^{-1}$ ) for CzBX molecules with  $\lambda_{\text{M}}=0.1$  eV and  $\lambda_{\text{M}}=0.2$  eV and considering Huang-Rhys (S) factor equals to zero.

| Molecules | $\lambda_{\text{intra}}$ (eV) | Huang-Rhys (S) factor equal to 0. | $k_{\text{RISC}}$ with $\lambda_{\text{M}}=0.1$ eV | $k_{\text{RISC}}$ with $\lambda_{\text{M}}=0.2$ eV |
|-----------|-------------------------------|-----------------------------------|----------------------------------------------------|----------------------------------------------------|
| CzBO      | 0.004                         | 0                                 | $2.46 \times 10^4$                                 | $1.26 \times 10^4$                                 |
| CzBS      | 0.006                         | 0                                 | $1.90 \times 10^6$                                 | $9.48 \times 10^5$                                 |
| CzBSe     | 0.003                         | 0                                 | $9.87 \times 10^7$                                 | $4.10 \times 10^7$                                 |

**Table S5b.** Calculation of  $k_{\text{RISC}}$  (in  $\text{s}^{-1}$ ) for CzBX molecules with  $\lambda_{\text{M}}=0.1$  eV and  $\lambda_{\text{M}}=0.2$  eV and considering Huang-Rhys (S) factor.

| Molecules | $\lambda_{\text{intra}}$ (eV) | Huang-Rhys (S) factor | Effective frequency, $\omega$ in $\text{cm}^{-1}$ | $k_{\text{RISC}}$ with $\lambda_{\text{M}}=0.1$ eV | $k_{\text{RISC}}$ with $\lambda_{\text{M}}=0.2$ eV |
|-----------|-------------------------------|-----------------------|---------------------------------------------------|----------------------------------------------------|----------------------------------------------------|
| CzBO      | 0.004                         | 0.036                 | 1353.25                                           | $2.38 \times 10^4$                                 | $1.19 \times 10^4$                                 |
| CzBS      | 0.006                         | 0.023                 | 1427.01                                           | $1.86 \times 10^6$                                 | $9.26 \times 10^5$                                 |
| CzBSe     | 0.003                         | 0.032                 | 1400.56                                           | $9.21 \times 10^7$                                 | $3.98 \times 10^7$                                 |

The total reorganization energy is combination of intramolecular reorganization and solvent (environmental) reorganization energy ( $\lambda_{\text{tot}} = \lambda_{\text{intra}} + \lambda_{\text{sol}}$ ). The contribution to the  $\lambda_{\text{intra}}$  by each normal mode is given by the following equation.

$$\lambda_{intra} = \sum \lambda_i = \sum \hbar \omega_i S_i$$

Where,  $S_i$  is the Huang-Rhys factor and  $\omega_i$  the frequency for  $i^{\text{th}}$  normal mode. When the contribution to the  $\lambda_{intra}$  is due to only a few ( $n$ ) effective normal modes,

$$S_{eff} = \sum_n S_n$$

$$\omega_{eff} = \frac{\sum_n S_n \times \omega_n}{\sum_n S_n}$$

**Table S5c.** Calculated  $k_{ISC}$  and  $k_{RISC}$  rate constants (in  $s^{-1}$ ) considering Marcus reorganization energy ( $\lambda_M$ ) equals to 0.1 and 0.2 eV, respectively.

| Molecules | $\lambda_M=0.1$ eV |                    | $\lambda_M=0.2$ eV |                    |
|-----------|--------------------|--------------------|--------------------|--------------------|
|           | Tot $k_{ISC}$      | Tot $k_{RISC}$     | Tot $k_{ISC}$      | Tot $k_{RISC}$     |
| CzBO      | $5.29 \times 10^6$ | $2.46 \times 10^4$ | $0.4 \times 10^7$  | $1.26 \times 10^4$ |
| CzBS      | $1.17 \times 10^8$ | $1.90 \times 10^6$ | $0.6 \times 10^8$  | $9.48 \times 10^5$ |
| CzBSe     | $5.07 \times 10^9$ | $9.87 \times 10^7$ | $2.11 \times 10^9$ | $0.41 \times 10^8$ |
| CzBO2O    | $4.00 \times 10^6$ | $9.24 \times 10^5$ | $1.17 \times 10^6$ | $2.70 \times 10^5$ |
| CzBO2S    | $4.25 \times 10^4$ | $3.78 \times 10^3$ | $1.20 \times 10^4$ | $1.13 \times 10^3$ |
| CzBO2Se   | $1.27 \times 10^5$ | $3.40 \times 10^4$ | $3.42 \times 10^4$ | $9.35 \times 10^3$ |
| CzBS2O    | $6.32 \times 10^6$ | $3.06 \times 10^4$ | $4.22 \times 10^6$ | $2.04 \times 10^4$ |
| CzBS2S    | $1.32 \times 10^4$ | $2.62 \times 10^2$ | $5.14 \times 10^3$ | $1.02 \times 10^2$ |
| CzBS2Se   | $3.06 \times 10^6$ | $6.38 \times 10^6$ | $9.04 \times 10^5$ | $2.41 \times 10^5$ |
| CzBSe2O   | $2.32 \times 10^8$ | $1.95 \times 10^5$ | $1.90 \times 10^8$ | $4.06 \times 10^5$ |
| CzBSe2S   | $5.18 \times 10^4$ | $1.21 \times 10^3$ | $2.09 \times 10^4$ | $5.02 \times 10^2$ |
| CzBSe2Se  | $4.40 \times 10^6$ | $5.70 \times 10^5$ | $1.41 \times 10^6$ | $1.79 \times 10^5$ |

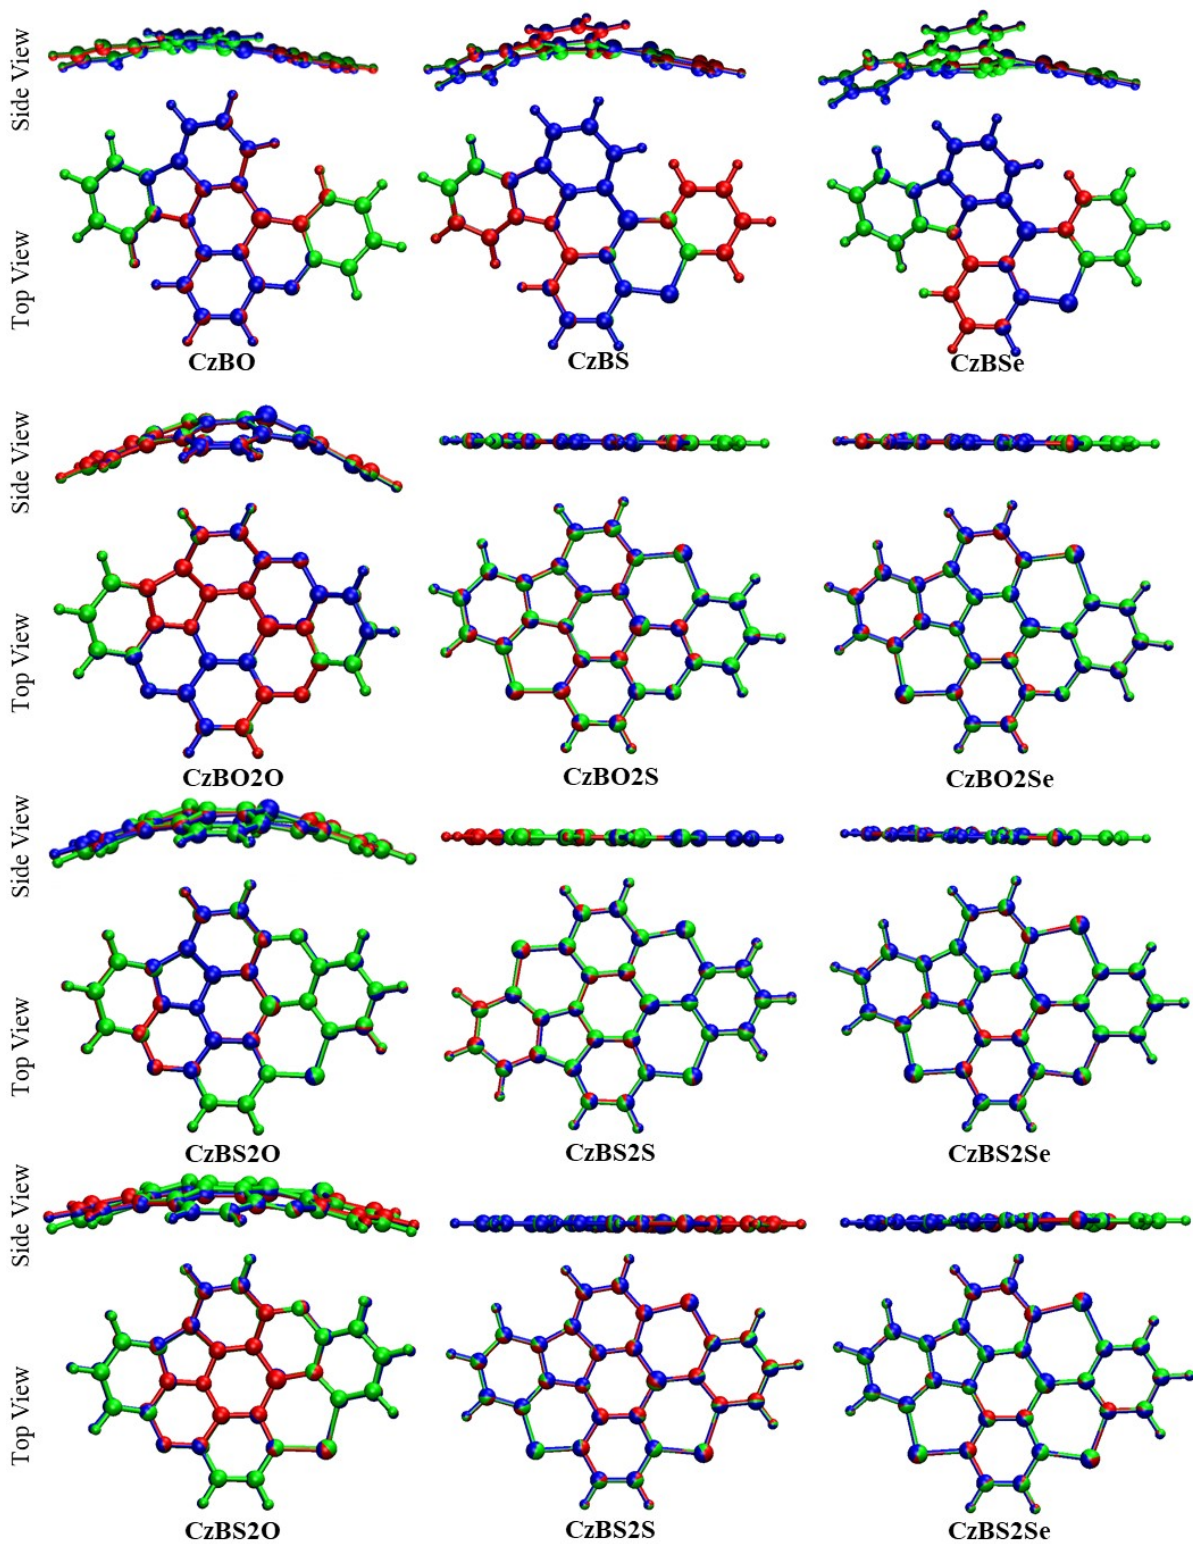

**Figure S1.** Excited states optimized structures (S<sub>1</sub> is blue color, T<sub>1</sub> is red color & T<sub>2</sub> is green color)

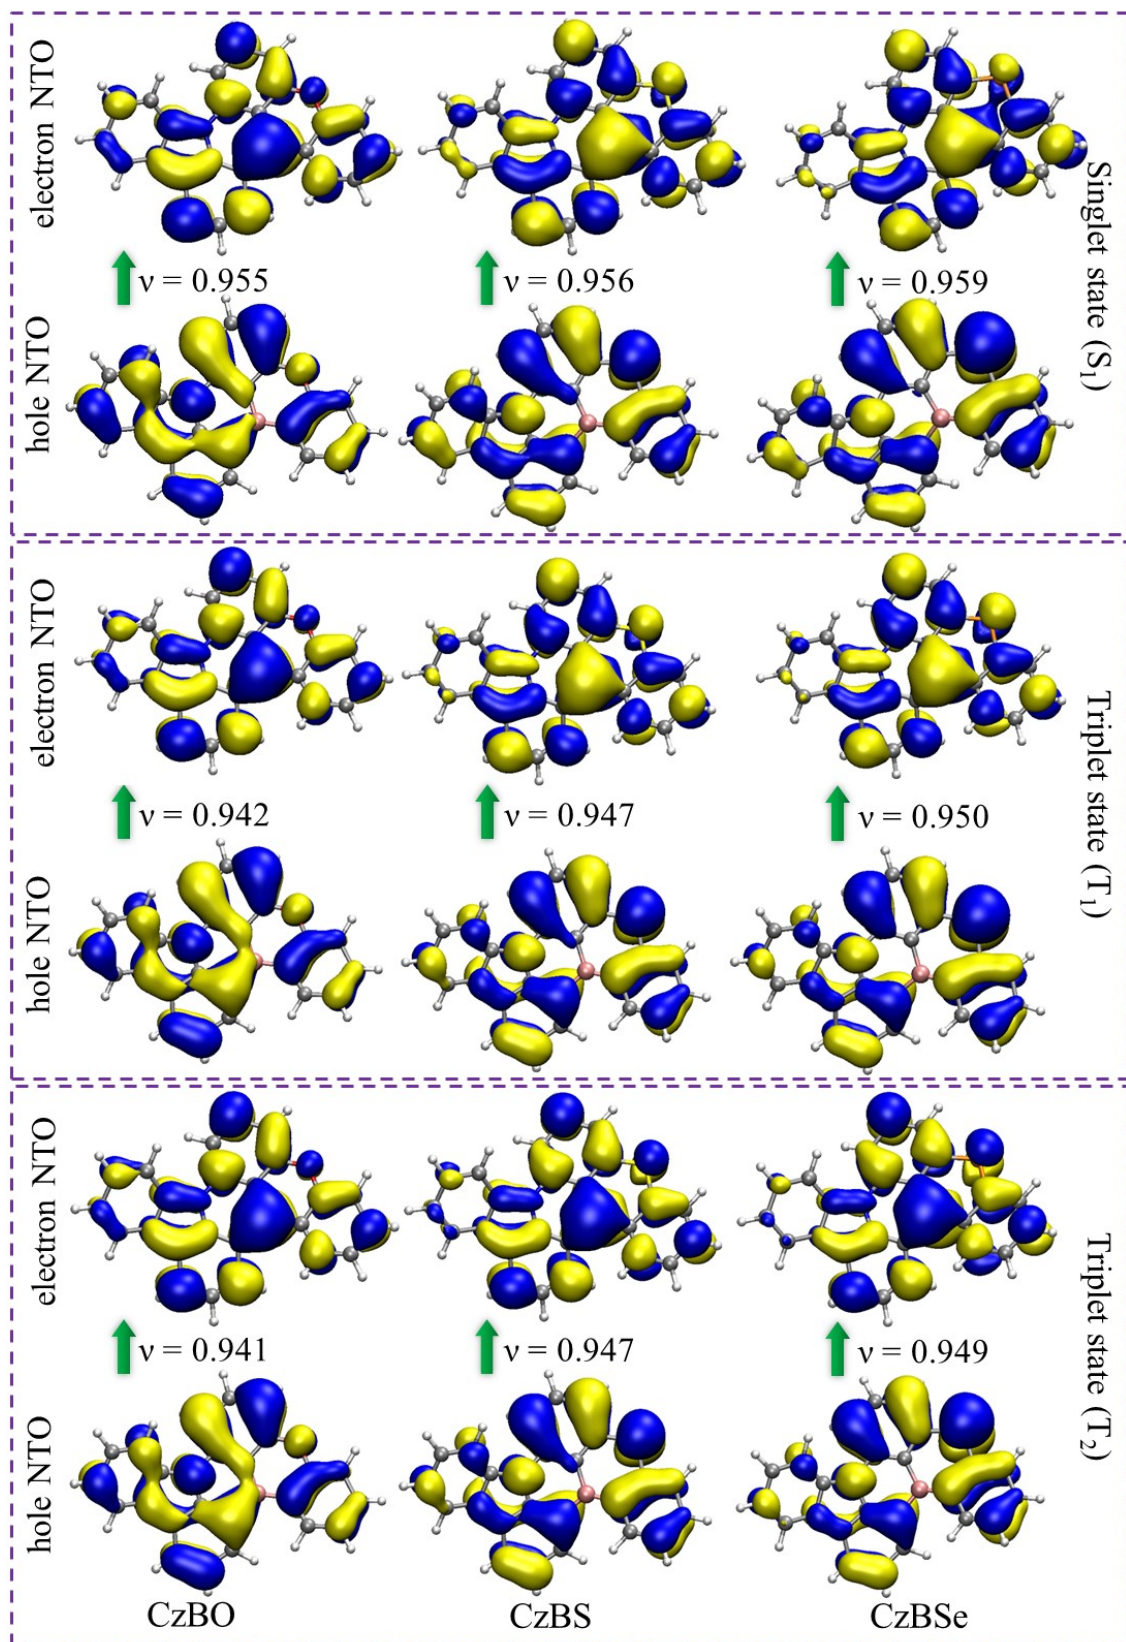

**Figure S2.** NTOs of CzBX series of molecules for their the  $S_1$ ,  $T_1$  and  $T_2$  states at their respective optimized geometries. The hole NTO and electron NTO (isovalue = 0.02 au) with the largest weight,  $v$ , are illustrated below and above the arrows, respectively. NTOs are calculated at OT-SRSH- $\omega$ B97XD/6-31+G\* level theory for all the molecules.



**Table S6.** Calculated excited states ( $S_1$ ,  $T_1$  &  $T_2$ ) chalcogens atom distance with carbon atom all values in Å.

| Molecules | eXa ( $S_1/T_1/T_2$ ) | eXb ( $S_1/T_1/T_2$ ) | eXc ( $S_1/T_1/T_2$ ) | eXd ( $S_1/T_1/T_2$ ) | eXe ( $S_1/T_1/T_2$ ) | eXf ( $S_1/T_1/T_2$ ) |
|-----------|-----------------------|-----------------------|-----------------------|-----------------------|-----------------------|-----------------------|
| CzO       | 1.354/1.356/1.355     | 1.375/1.373/1.373     |                       |                       |                       |                       |
| CzS       | 1.754/1.753/1.753     | 1.763/1.76/1.76       | -                     | -                     | -                     | -                     |
| CzSe      | 1.879/1.874/1.874     | 1.886/1.881/1.881     |                       |                       |                       |                       |
| CzO2O     | 1.37/1.373/1.374      | 1.403/1.399/1.4       | 1.376/1.382/1.382     | 1.377/1.39/1.372      | 1.395/1.372/1.391     | 1.399/1.4/1.402       |
| CzO2S     | 1.363/1.365/1.372     | 1.398/1.395/1.383     | 1.762/1.768/1.735     | 1.76/1.758/1.754      | 1.806/1.805/1.786     | 1.82/1.819/1.8        |
| CzO2Se    | 1.359/1.36/1.361      | 1.389/1.387/1.389     | 1.922/1.929/1.924     | 1.923/1.921/1.916     | 1.974/1.974/1.968     | 1.987/1.987/1.981     |
| CzS2O     | 1.778/1.777/1.796     | 1.808/1.809/1.799     | 1.38/1.384/1.387      | 1.377/1.372/1.399     | 1.387/1.382/1.367     | 1.395/1.397/1.398     |
| CzS2S     | 1.758/1.758/1.779     | 1.786/1.787/1.781     | 1.755/1.762/1.779     | 1.757/1.752/1.796     | 1.782/1.78/1.739      | 1.799/1.799/1.795     |
| CzS2Se    | 1.75/1.749/1.748      | 1.774/1.744/1.773     | 1.916/1.923/1.918     | 1.921/1.918/1.912     | 1.948/1.946/1.940     | 1.965/1.964/1.958     |
| CzSe2O    | 1.952/1.952/1.966     | 1.987/1.989/1.97      | 1.38/1.383/1.386      | 1.379/1.374/1.399     | 1.384/1.379/1.363     | 1.392/1.395/1.397     |
| CzSe2S    | 1.924/1.923/1.918     | 1.954/1.955/1.95      | 1.752/1.758/1.758     | 1.757/1.751/1.75      | 1.774/1.772/1.771     | 1.791/1.791/1.79      |
| CzSe2Se   | 1.915/1.913/1.909     | 1.942/1.941/1.937     | 1.912/1.919/1.914     | 1.921/1.918/1.913     | 1.939/1.937/1.932     | 1.958/1.957/1.952     |

Here red accent is bond distance between Oxygen atom and nearest Carbon atom  $d(O-C)$ , yellow is  $d(S-C)$ , Orange is  $d(Se-C)$ . see **Figure 4**.

**Table S7.** Calculated emission rate  $k_F$  and  $k_P$  at 300° temperature.

| Molecules | $k_F$ ( $s^{-1}$ ) | $k_P$ ( $s^{-1}$ ) |                    |                    |                    |
|-----------|--------------------|--------------------|--------------------|--------------------|--------------------|
|           |                    | $T_1$              | $T_2$              | $T_3$              | Tot. $k_P$         |
| CzBO      | $1.74 \times 10^8$ | $0.26 \times 10^1$ | $0.28 \times 10^1$ | $0.14 \times 10^1$ | 2.28               |
| CzBS      | $1.51 \times 10^8$ | $5.03 \times 10^2$ | $3.33 \times 10^1$ | $0.11 \times 10^1$ | $1.79 \times 10^2$ |
| CzBSe     | $1.46 \times 10^8$ | $5.94 \times 10^2$ | $1.47 \times 10^3$ | $1.98 \times 10^1$ | $6.96 \times 10^2$ |
| CzBO2O    | $1.14 \times 10^8$ | 0                  | 0                  | $0.54 \times 10^1$ | 1.81               |
| CzBO2S    | $9.00 \times 10^7$ | $1.81 \times 10^1$ | $2.73 \times 10^1$ | 0                  | $1.52 \times 10^1$ |
| CzBO2Se   | $9.13 \times 10^7$ | $7.35 \times 10^2$ | $1.91 \times 10^3$ | $3.17 \times 10^3$ | $1.94 \times 10^3$ |
| CzBS2O    | $1.22 \times 10^8$ | $5.22 \times 10^1$ | $8.03 \times 10^1$ | $2.54 \times 10^1$ | $5.26 \times 10^1$ |
| CzBS2S    | $9.24 \times 10^7$ | $3.25 \times 10^1$ | $1.38 \times 10^1$ | 0                  | $1.54 \times 10^1$ |
| CzBS2Se   | $8.51 \times 10^7$ | $1.41 \times 10^3$ | $3.40 \times 10^1$ | $4.91 \times 10^2$ | $6.43 \times 10^2$ |
| CzBSe2O   | $1.42 \times 10^8$ | $2.41 \times 10^4$ | $3.72 \times 10^2$ | $1.50 \times 10^3$ | $8.65 \times 10^3$ |
| CzBSe2S   | $8.62 \times 10^7$ | $4.84 \times 10^4$ | $5.60 \times 10^2$ | $2.41 \times 10^1$ | $1.63 \times 10^4$ |
| CzBSe2Se  | $8.33 \times 10^7$ | $1.64 \times 10^3$ | $2.92 \times 10^1$ | $9.10 \times 10^2$ | $8.61 \times 10^2$ |

The average phosphorescence rate constant was calculated using the following equation:

$$k_{ph}^{av} = \frac{k_1 + k_2 + k_3}{3}$$

The zero-field splitting (ZFS) was not significant and neglected for the calculation of average phosphorescence rate constant.

## References

- (1) D. G. Liakos, M. Sparta, M. K. Kesharwani, J. M. L. Martin and F. Neese, *J. Chem. Theory Comput.*, 2015, **11**, 1525–1539.
- (2) B. Kozma, R. Berraud-Pache, A. Tajti, P. G. Szalay, *Mol. Phys.* 2020, **118**, e1776903.
- (3) I. S. Park, H. Min and T. Yasuda, *Angew. Chem. Int. Ed.* 2022, **134**, e202205684.
